# Supplementary material
Source: MDPI journal article supplement (https://www.mdpi.com/1424-2818/15/10/1095)
Supplement: s1 [file s1]

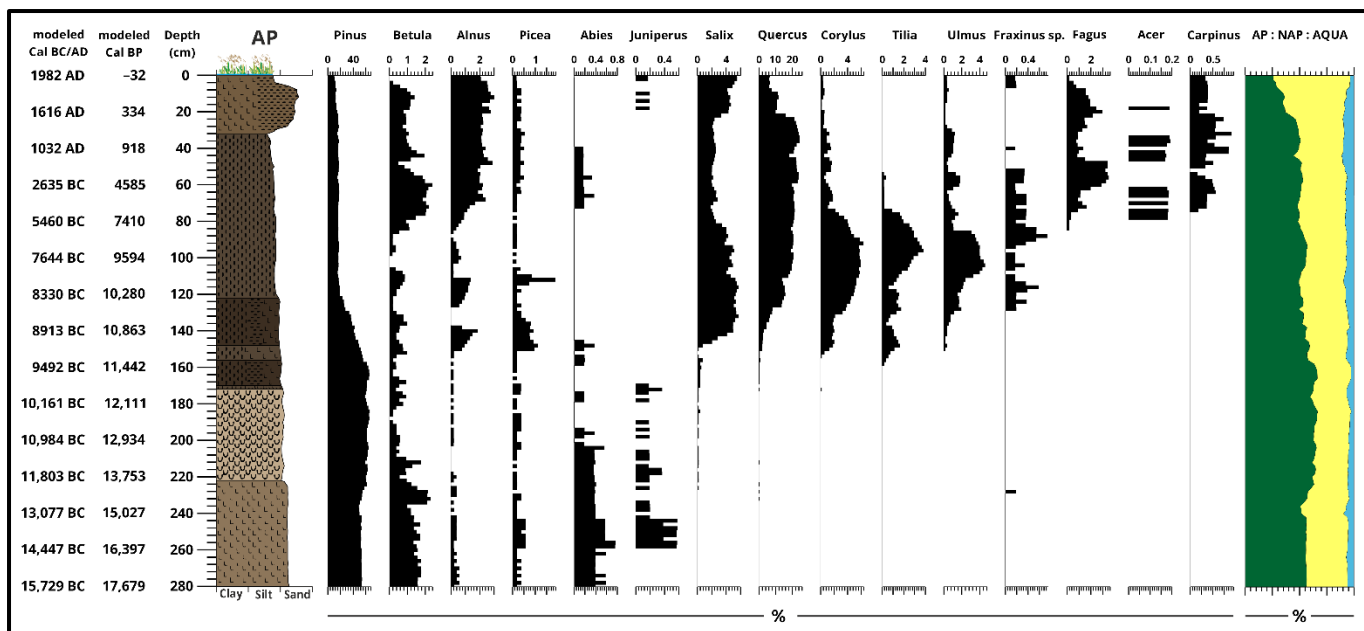

**Figure S1.** Results of pollen analyses 1. (Arbor-Pollen) [4] plotted to depth (cm), with modelled median ages [2], lithostratigraphy [2] and ratio of sum pollen (%).

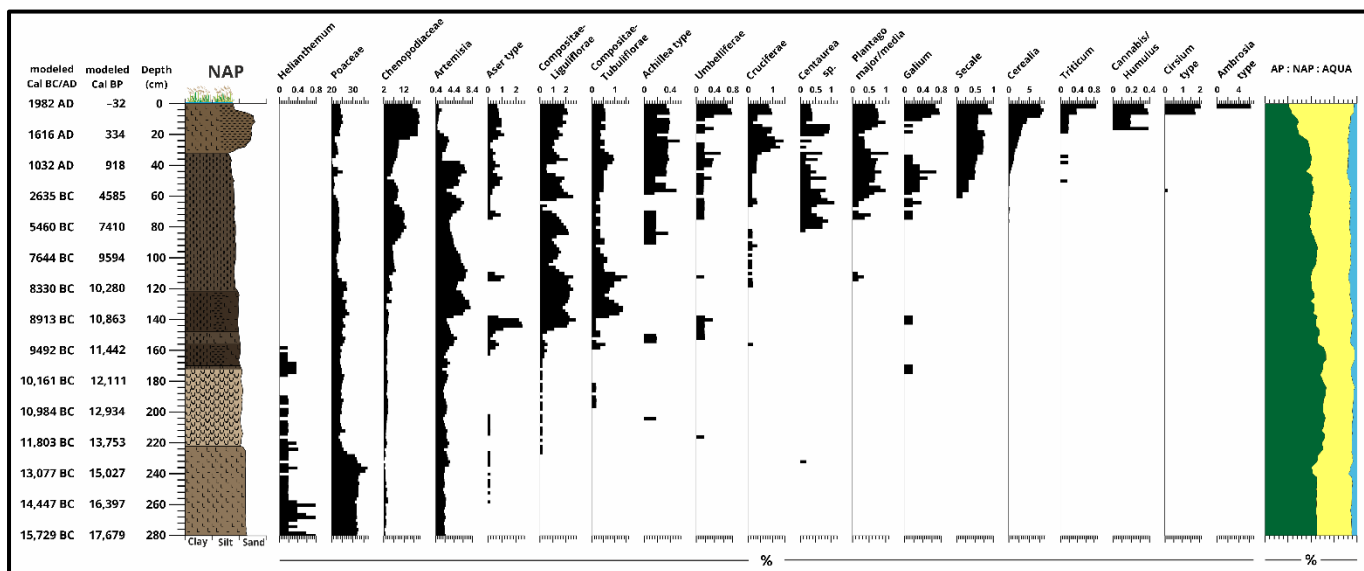

**Figure S2.** Results of pollen analyses 2. (Non-Arbor Pollen) [4] plotted to depth (cm), with modelled median ages [2], lithostratigraphy [2] and ratio of sum pollen (%).



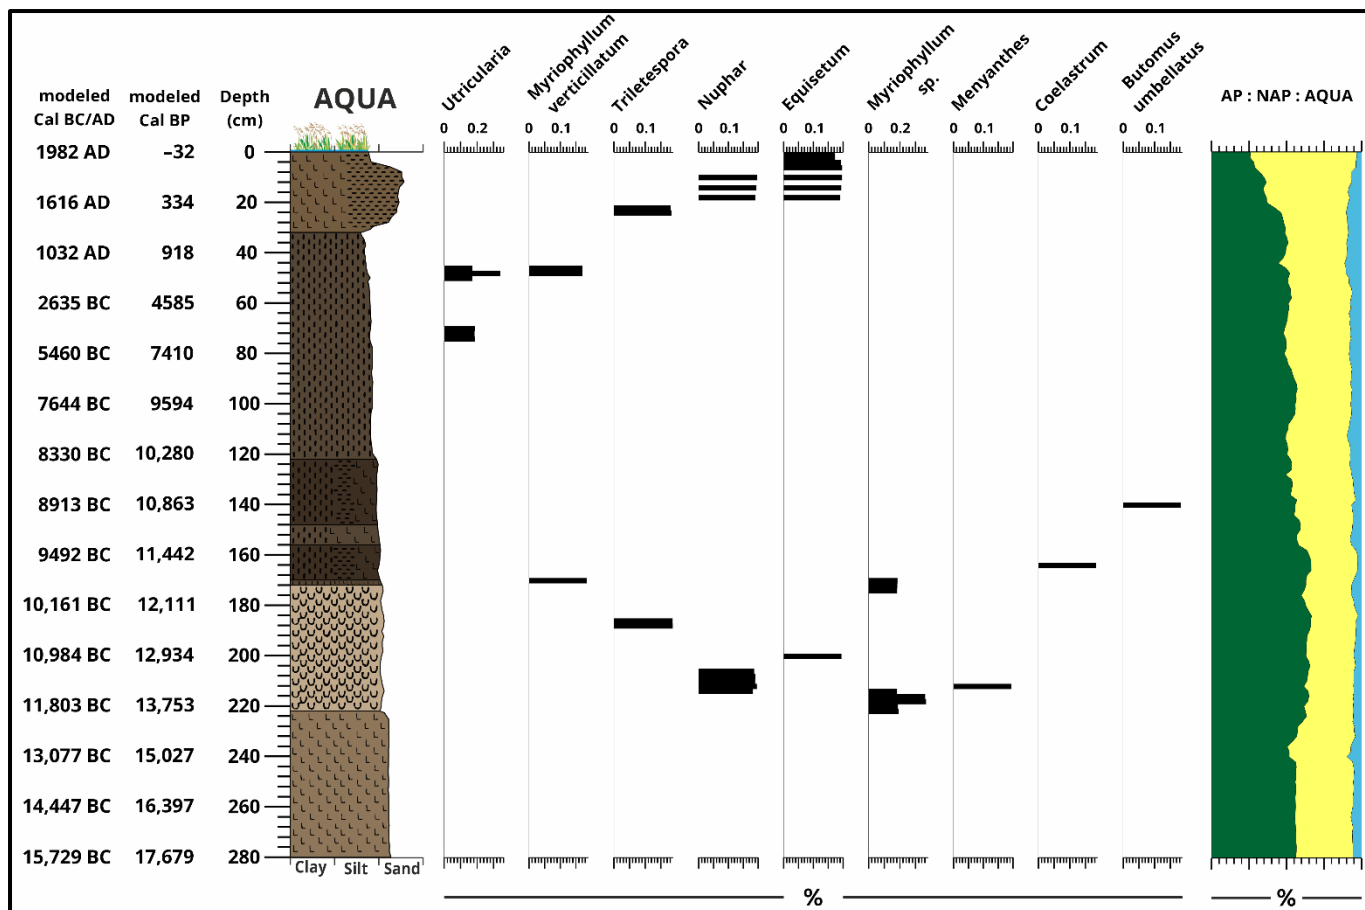

**Figure S5.** Results of pollen analyses 5. (Aquatic Pollen) [4] plotted to depth (cm), with modelled median ages [2], lithostratigraphy [2] and ratio of sum pollen (%).

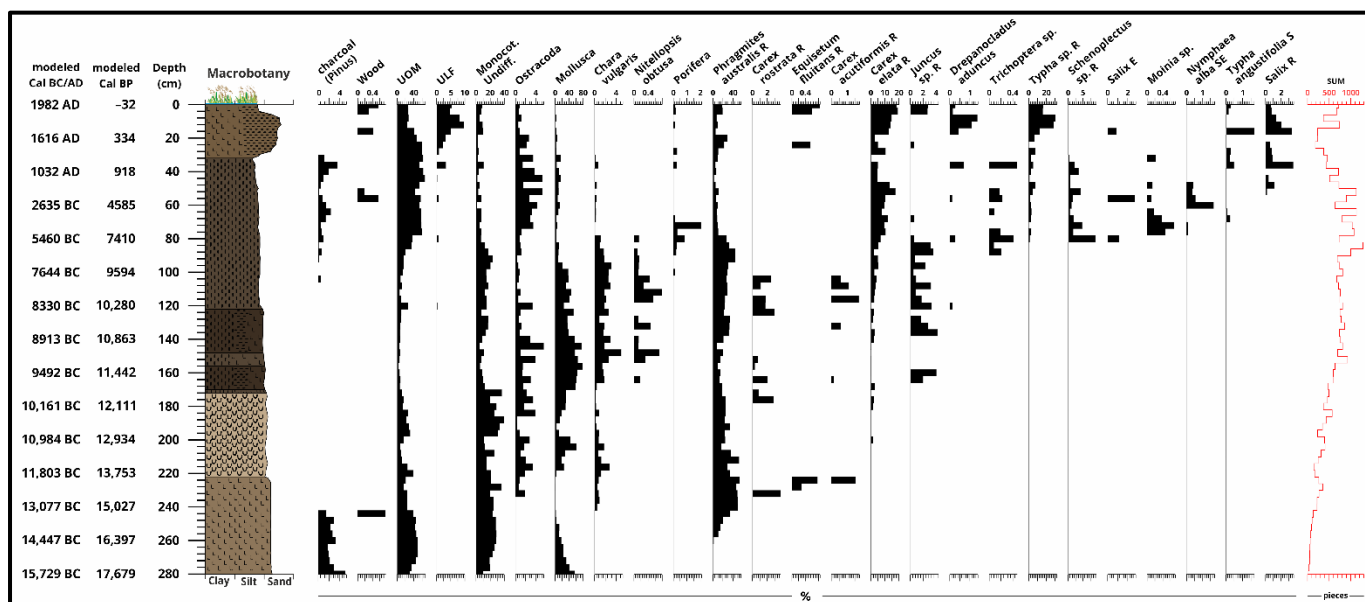

**Figure S6.** Results of macrobotanical analyses [3] plotted to depth (cm), with modelled median ages [2], lithostratigraphy [2] and sum of remains (pieces).

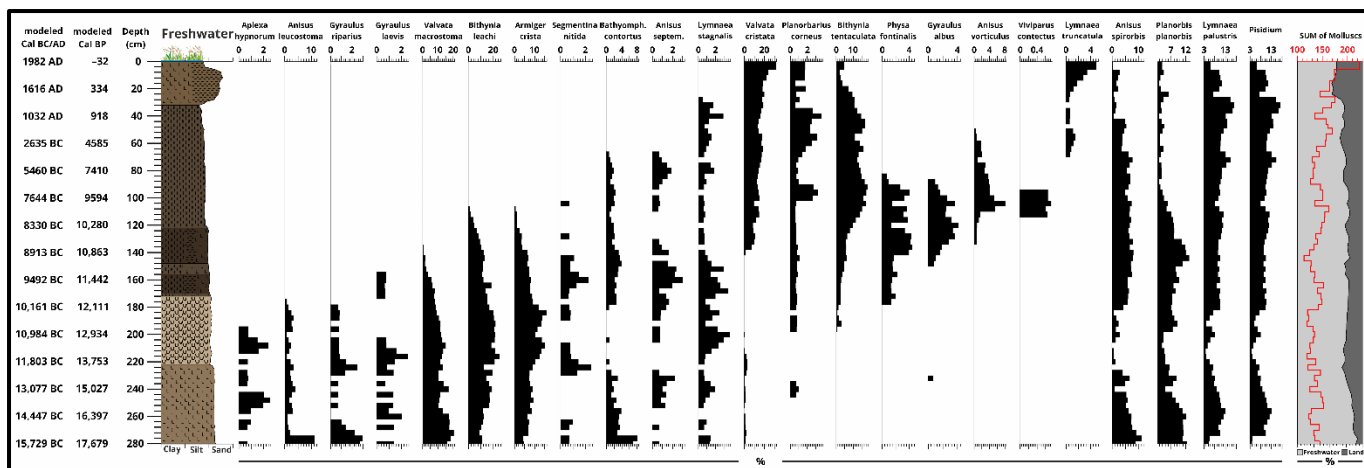

**Figure S7.** Results of malacological analyses 1. (Freshwater molluscs and mussels) [4] plotted to depth (cm), with modelled median ages [2], lithostratigraphy [2] and sum of molluscs (pieces) and their ratio (%).

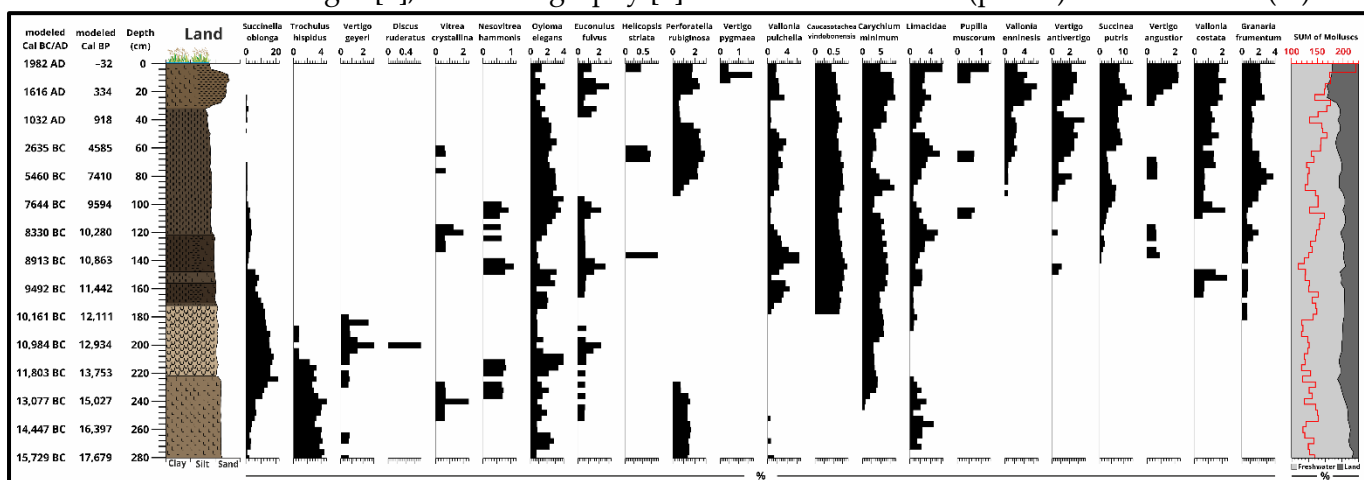

**Figure S8.** Results of malacological analyses 2. (Terrestrial molluscs) [4] plotted to depth (cm), with modelled median ages [2], lithostratigraphy [2] and sum of molluscs (pieces) and their ratio (%).
